# Supplementary material
Source: publisher site journal article supplement (https://www.dovepress.com/article/461018)
Supplement: Supplementary file 1 [file get_supplementary_file.php]

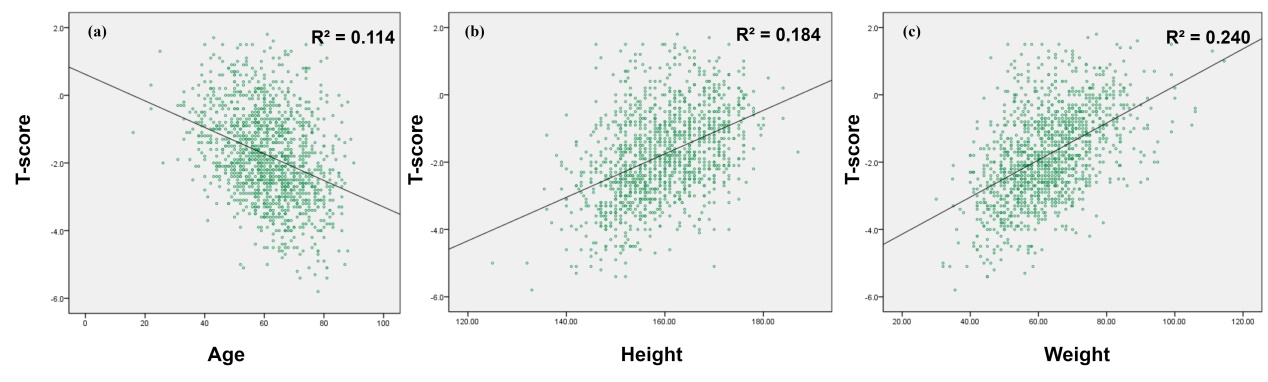


**Supplementary Fig 1**. Scatter plots (a), (b), and (c) show the correlation of T-score with age, height, and weight, respectively.
